# Supplementary material
Source: bioRxiv or medRxiv preprint supplement (https://www.biorxiv.org/highwire/filestream/3441/field_highwire_adjunct_files/9/013631-3.pdf)

1 2 3 4 5 6 7 8 9 10 11 12

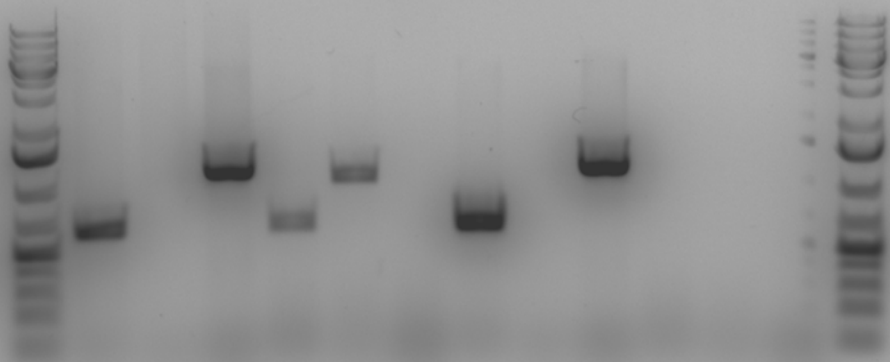

Supplement: Supplementary file [file 013631-3.pdf]
